# Supplementary material for: Essential Oil of Carvone Chemotype Lippia alba (Verbenaceae) Regulates Lipid Mobilization and Adipogenesis in Adipocytes
Source: MDPI journal article supplement (doi:10.3390/cimb44110389), 2022-11-18
Supplement: s1 [file s1]

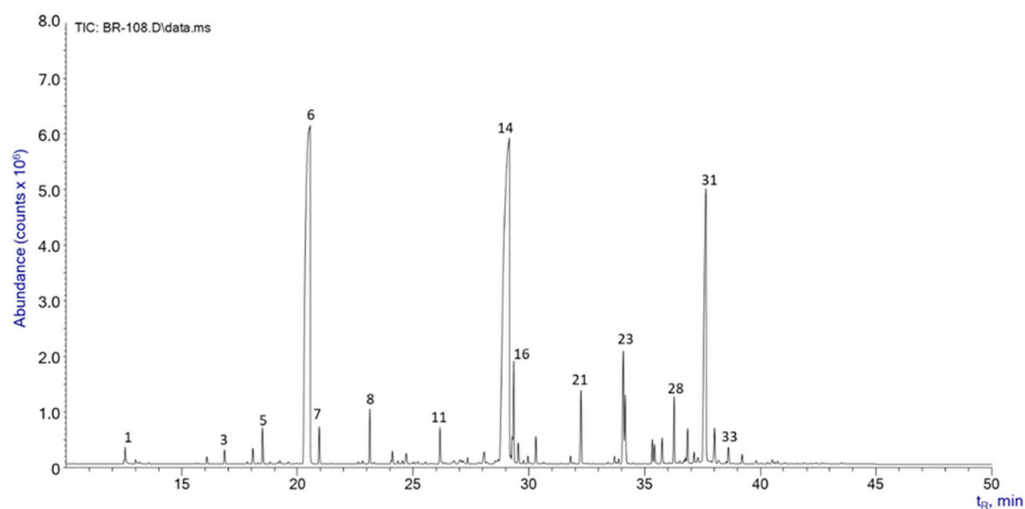

**Figure S1.** Chromatographic profile (GC/MS, full scan) of *Lippia alba* carvone chemotype essential oil. DB-5MS (60 m) column, *split* 1:30, MSD (EI, 70 eV). Compound identification appears in **Table 1**.

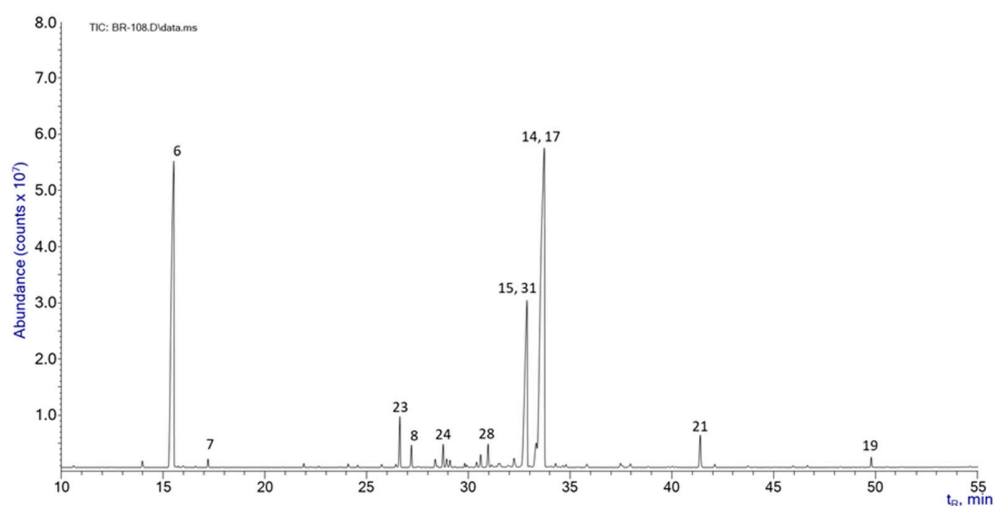

**Figure S2.** Chromatographic profile (GC/MS, full scan) of *Lippia alba* carvone chemotype, essential oil. DB-WAX (60 m) column, *split* 1:30, MSD (EI, 70 eV). Compound identification appears in **Table 1**.
